# Supplementary material for: P elements and MITE relatives in the whole genome sequence of Anopheles gambiae
Source: PubMed Central journal article supplement (PMC1562414; doi:10.1186/1471-2164-7-214), 2006-08-18
Supplement: 1471-2164-7-214-S1.pdf [file 1471-2164-7-214-S1.pdf]

## Additional File 1

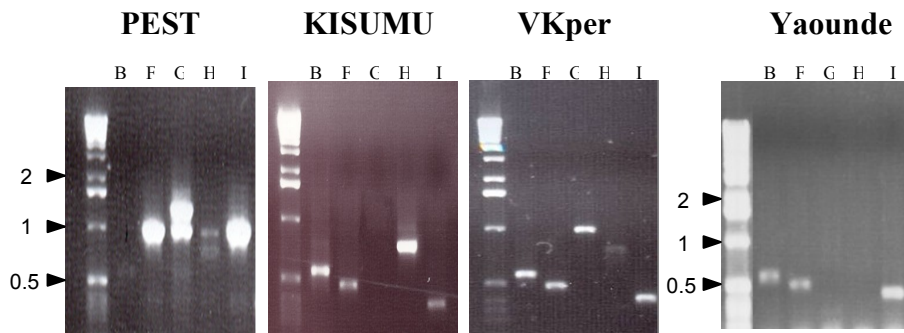

Illustration of the insertion site polymorphism of *P* transposable elements in *Anopheles gambiae* populations

Five insertion site of AgaP2 subfamily copies localized in the genomic sequence of PEST.

Agarose gel showing PCR products visualized by ethidium bromide and obtained from DNA of four distinct populations: PEST, KISUMU, VKper and Yaoundé.

| Copy | Insertion site coordinate* | Primers                                                          | Anneal. T°       | PCR Anneal. T° |        | Amplified Length |            |
|------|----------------------------|------------------------------------------------------------------|------------------|----------------|--------|------------------|------------|
|      |                            |                                                                  |                  | PEST           | others | Occupied site    | Empty site |
| All  |                            | Nested primer :<br>GGGGCTGTCATATTTCGATGGCTCG                     | 64°C             |                |        |                  |            |
| B    | Chr 2R:<br>35522531        | fl 5' - GGCCAACCGGCGACTAAAACC<br>fl 3' - TCACCTTACCTTTGCCGGTGG   | 64°C<br>65°C     | 64°C           | 59°C   | 837 bp           | 555 bp     |
| F    | Chr 2L:<br>9639890         | fl 5' - GGTGTGTGTTCCCTCCGTTTCC<br>fl 3' - TGCCGCAAAACGTCAAAGCTTC | 60°C<br>61°C     | 60°C           | 55°C   | 975 bp           | 476 bp     |
| G    | Chr 3R:<br>51957269        | fl 5' - GTCCTGCTTTGGCGTATCGGGG<br>fl 3' - CACACTGGGTCAAAAATCGCGC | 63°C<br>61°C     | 61°C           | 56°C   | 1307 bp          | 991 bp     |
| H    | Chr 3R:<br>48892255        | fl 5' - AGCGCATGCTTCCGTCAGCCCC<br>fl 3' - GGGGGCGAGGAACAGAGAGGCG | 68°C<br>67°C     | 64°C           | 59°C   | 955 bp           | 777 bp     |
| I    | Chr 3L:<br>30318829        | fl 5' - ATCGCGTGCGGTTTTGTCTG<br>fl 3' - TGTCGTCCGGTTGGGGCGTTG    | 62.6°C<br>67.2°C | 64°C           | 59°C   | 1000 bp          | 399 bp     |

fl 5': primer designed in the 5' genomic flanking sequence; fl 3' : primer designed in the 3' genomic flanking sequence  
\* Assembly MOZ 2a

### PCR conditions:

For each copy (B, F, G, H, I), 3 primers were designed: two chosen from the genomic sequence flanking the copy and one nested. A PCR reaction contains the 3 primers.

Annealing temperature, specific to each set of primers, is applied for PCR on PEST and Kiss DNA (S molecular type), but decreased of 5°C when applied to Vk-per and Yaoundé DNA (M molecular type). This modification turned out to be necessary because of the nucleotide divergences between these molecular type (della Torre et al. 2001. *Insect Mol. Biol.* 10 (1), 9-18.; Gentile, G. et al. 2004. *Insect Mol. Biol.* 13(4) 371-377).

Temperature cycling parameters: First 94°C 3 min, then 30 cycles as follows: denaturation: 94°C 1 min, annealing: depending on the set of primers (see Table below) 1 min, elongation: 72°C 1min30 and final cycle of 72°C for 10 min.
